# Supplementary material for: Examination of the differences between sulforaphane and sulforaphene in colon cancer: A study based on next-generation sequencing
Source: PubMed Central journal article supplement — Oncol Lett. 2021 Aug 1;22(4):690. doi: 10.3892/ol.2021.12951 (PMC8358736; doi:10.3892/ol.2021.12951), 2021-08-01
Supplement: Supplementary_Data.pdf [file Supplementary_Data.pdf]

Figure S1. IC<sub>50</sub> values were determined after 48-h treatment of SW480 cells with sulforaphane or sulforaphene. (A) Sulforaphane-treated. (B) Sulforaphene-treated. The x-axis represents the concentration of the compound after log conversion, where  $\log(25) = 1.398 \mu\text{mol/l}$ .

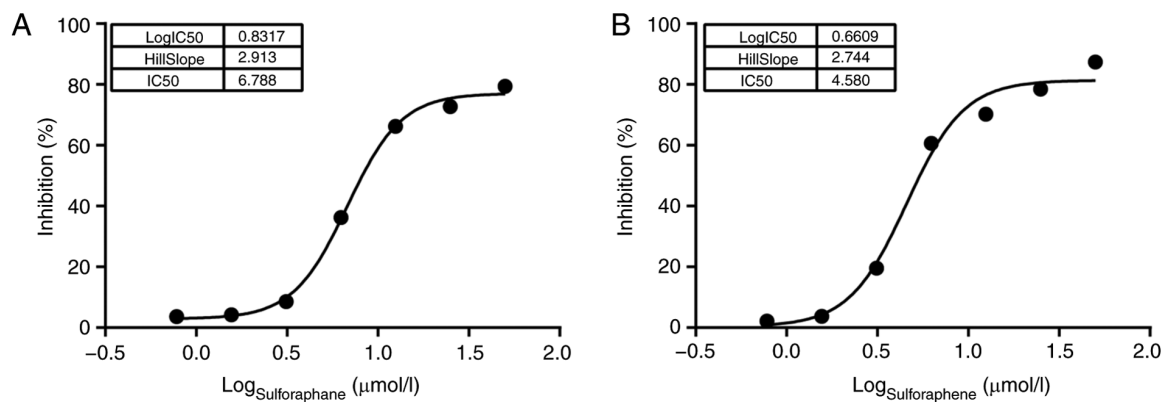



Figure S3. Principal component analysis results of sample signal strength between the three groups.

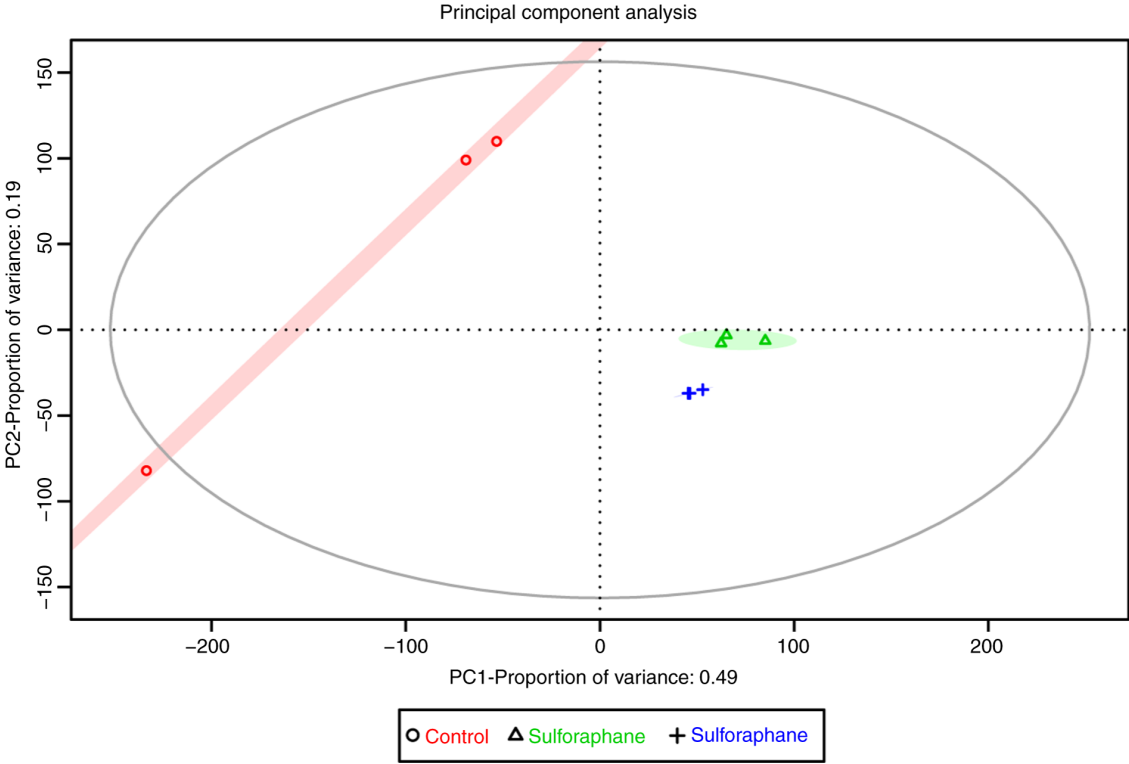

Figure S4. Pathways affected by sulforaphane and sulforaphene treatment. (A and B) p53 signaling pathway affected by (A) sulforaphane and (B) sulforaphene. (C and D) MAPK signaling pathway affected by (C) sulforaphane and (D) sulforaphene. (E and F) FOXO signaling pathway affected by (E) sulforaphane and (F) sulforaphene. (G and H) WNT signaling pathway affected by (G) sulforaphane and (H) sulforaphene. Red indicates that the gene is upregulated, whereas blue indicates that the gene is downregulated.

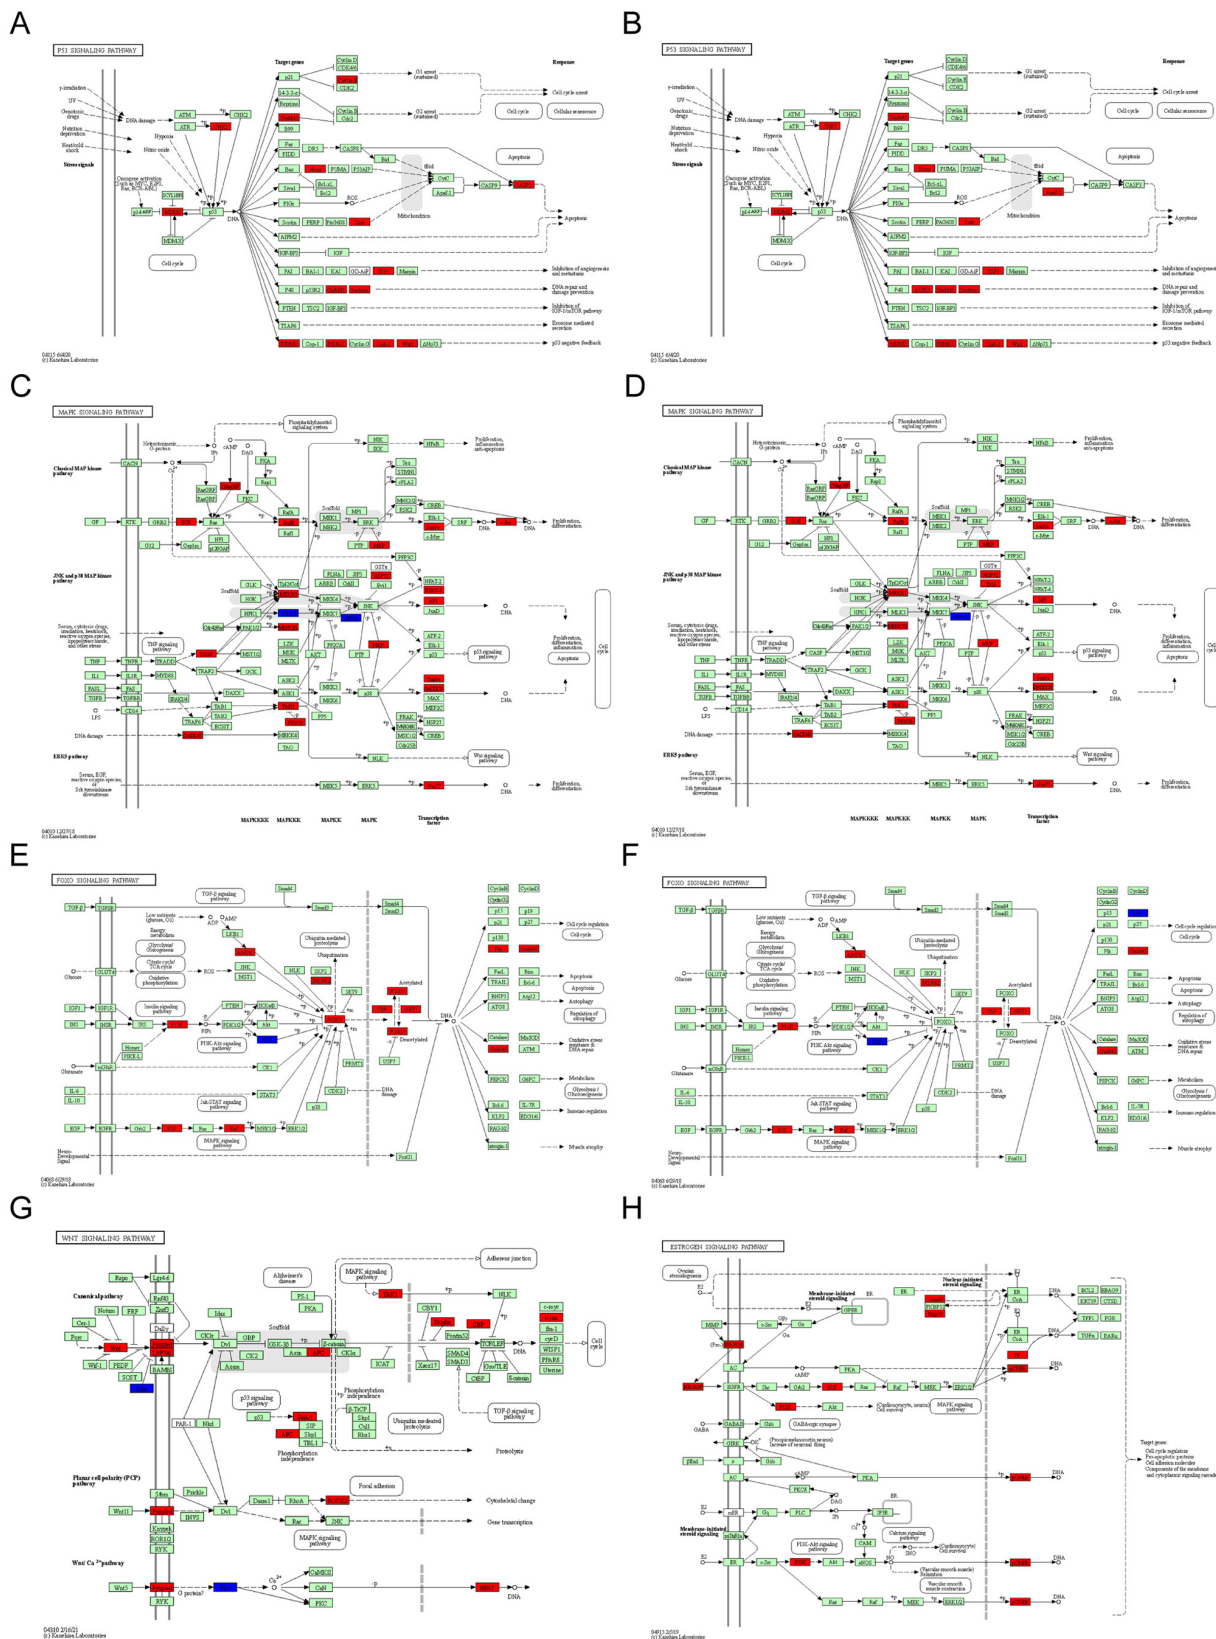

Table SI. Quality control results of RNA samples.

| Sample name | Group        | Concentration, ng/ $\mu$ l | Nanodrop<br>2000 parameters |      | Agilent 2100 parameters |           |
|-------------|--------------|----------------------------|-----------------------------|------|-------------------------|-----------|
|             |              |                            | A260/A280                   | RIN  | 28S/18S                 | Result    |
| E9305-1     | Control      | 1,982.1                    | 2.02                        | 9.8  | 2.0                     | Qualified |
| E9305-2     | Control      | 1,921.2                    | 1.81                        | 10.0 | 2.4                     | Qualified |
| E9305-3     | Control      | 1,920.9                    | 1.96                        | 9.9  | 2.1                     | Qualified |
| E9306-1     | Sulforaphane | 1,435.9                    | 1.59                        | 9.7  | 2.2                     | Qualified |
| E9306-2     | Sulforaphane | 1,444.0                    | 1.71                        | 9.7  | 2.0                     | Qualified |
| E9306-3     | Sulforaphane | 1,454.2                    | 2.03                        | 9.7  | 2.1                     | Qualified |
| E9307-1     | Sulforaphane | 1,545.8                    | 2.16                        | 9.2  | 1.7                     | Qualified |
| E9307-2     | Sulforaphane | 1,496.6                    | 1.68                        | 9.2  | 1.7                     | Qualified |
| E9307-3     | Sulforaphane | 1,446.4                    | 2.05                        | 9.0  | 1.6                     | Qualified |

RIN, RNA integrity number.
